# Supplementary material for: Optimisation of dynamic nuclear polarisation using “off-the-shelf” Gd(iii)-based polarising agents
Source: Royal Society of Chemistry journal article supplement (doi:10.1039/d4cp02924k), 2024-01-01
Supplement: d4cp02924k1.pdf [file d4cp02924k1.pdf]

## Supporting information for

# Optimisation of Dynamic Nuclear Polarisation using “off-the-shelf” Gd(III)-based polarising agents

Daniel J. Cheney<sup>a</sup>, Paolo Cerreia Vioglio<sup>b</sup>, Adam Brookfield<sup>c</sup>  
and Frédéric Blanc<sup>\*ade</sup>

<sup>a</sup> *Department of Chemistry, University of Liverpool, Liverpool L69 7ZD, United Kingdom*

<sup>b</sup> *DNP MAS NMR Facility, Sir Peter Mansfield Imaging Centre, University of Nottingham, Nottingham NG7 3RD, United Kingdom*

<sup>c</sup> *Department of Chemistry and Photon Science Institute, University of Manchester, Manchester M13 9PL, United Kingdom*

<sup>d</sup> *Leverhulme Research Centre for Functional Materials Design, Materials Innovation Factory, University of Liverpool, Liverpool, L69 7ZD, United Kingdom*

<sup>e</sup> *Stephenson Institute for Renewable Energy, University of Liverpool, Liverpool L69 7ZF, United Kingdom*

\* *Author to whom correspondence should be addressed:  
frederic.blanc@liverpool.ac.uk*

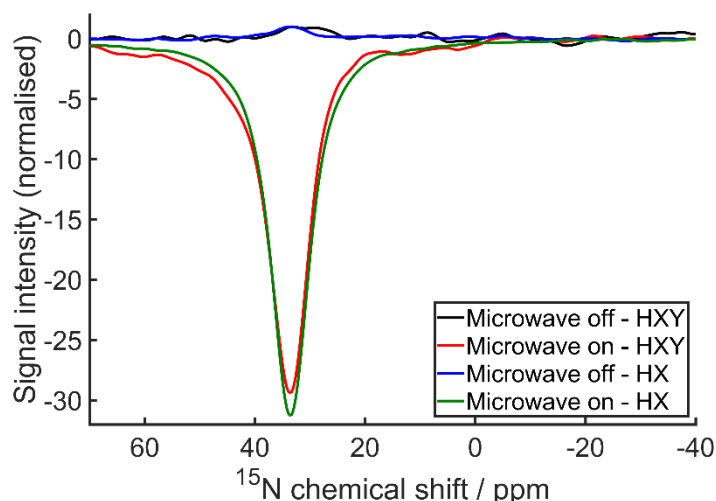

Figure S1: Comparison of the DNP-enhanced  $^{15}\text{N}$  NMR spectra of  $2\text{-}^{13}\text{C},^{15}\text{N}$ -glycine with 20 mM  $\text{GdBr}_3$ , using a triple resonance (HXY) or double resonance (HX) probe.

Table S1: List of peaks found in the HRMS spectra of all Gd(III) compounds in 3/2 v/v glycerol/ $\text{H}_2\text{O}$  Peaks arising from the fragmentation of glycerol are not shown.

| Species                                                                                                                        | m/z (calculated) | m/z (observed) |
|--------------------------------------------------------------------------------------------------------------------------------|------------------|----------------|
| $\text{Gd}(\text{NO}_3)_3 \cdot 6\text{H}_2\text{O}$                                                                           |                  |                |
| $[\text{GdO}]^+$                                                                                                               | 173.9190         | 173.9185       |
| $[\text{Gd}^{3+} + 2 \times \text{glycerol} - 2 \times \text{H}^+]^+$                                                          | 340.0031         | 340.0026       |
| $[\text{Gd}^{3+} + 2 \times \text{glycerol} + \text{NO}_3^- - \text{H}^+]^+$                                                   | 402.9988         | 402.9981       |
| $\text{GdCl}_3 \cdot 6\text{H}_2\text{O}$                                                                                      |                  |                |
| $[\text{GdO}]^+$                                                                                                               | 173.9190         | 173.9188       |
| $[\text{Gd}^{3+} + 2 \times \text{glycerol} - 2 \times \text{H}^+]^+$                                                          | 340.0031         | 340.0034       |
| $[\text{Gd}^{3+} + 2 \times \text{glycerol} + \text{Cl}^- - \text{H}^+]^+$                                                     | 375.9798         | 375.9793       |
| $\text{Gd}_2(\text{SO}_4)_3 \cdot 8\text{H}_2\text{O}$                                                                         |                  |                |
| $[\text{GdO}]^+$                                                                                                               | 173.9190         | 173.9184       |
| $[\text{Gd}^{3+} + 2 \times \text{glycerol} - 2 \times \text{H}^+]^+$                                                          | 340.0031         | 340.0022       |
| $[\text{Gd}^{3+} + 2 \times \text{glycerol} + \text{SO}_4^{2-}]^+$                                                             | 437.9705         | 437.9605       |
| $\text{GdBr}_3 \cdot 13\text{H}_2\text{O}$                                                                                     |                  |                |
| $[\text{GdO}]^+$                                                                                                               | 173.9190         | 173.9179       |
| $[\text{Gd}^{3+} + 2 \times \text{glycerol} - 2 \times \text{H}^+]^+$                                                          | 340.0031         | 340.0021       |
| $[\text{Gd}^{3+} + 2 \times \text{glycerol} + \text{Br}^- - \text{H}^+]^+$                                                     | 419.9293         | 419.9267       |
| $\text{Gd}(\text{OAc})_3 \cdot 4\text{H}_2\text{O}$                                                                            |                  |                |
| $[\text{GdO}]^+$                                                                                                               | 173.9190         | 173.9181       |
| $[2 \times \text{Gd}^{3+} + 2 \times \text{glycerol} - 4 \times \text{H}^+]^{2+}$                                              | 247.9558         | 247.9546       |
| $[2 \times \text{Gd}^{3+} + 6 \times \text{H}_2\text{O} + 2 \times \text{OAc}^- - 2 \times \text{H}^+]^{2+}$                   | 269.9613         | 269.9684       |
| $[2 \times \text{Gd}^{3+} + 10 \times \text{H}_2\text{O} + \text{OAc}^- - 3 \times \text{H}^+]^{2+}$                           | 275.9718         | 275.9689       |
| $[2 \times \text{Gd}^{3+} + 3 \times \text{glycerol} - 4 \times \text{H}^+]^{2+}$                                              | 293.9795         | 293.9806       |
| $[\text{Gd}^{3+} + 2 \times \text{glycerol} - 2 \times \text{H}^+]^+$                                                          | 340.0031         | 340.0027       |
| $[2 \times \text{Gd}^{3+} + \text{glycerol} + 12 \times \text{H}_2\text{O} + \text{OAc}^- - 3 \times \text{H}^+]^{2+}$         | 340.0061         | 340.0027       |
| $[2 \times \text{Gd}^{3+} + 2 \times \text{glycerol} + 7 \times \text{H}_2\text{O} + \text{OAc}^- - 3 \times \text{H}^+]^{2+}$ | 341.0033         | 341.0043       |
| $[2 \times \text{Gd}^{3+} + 2 \times \text{glycerol} + \text{H}_2\text{O} + 2 \times \text{OAc}^- - 3 \times \text{H}^+]^+$    | 632.9566         | 632.9554       |
| $[2 \times \text{Gd}^{3+} + \text{glycerol} + 2 \times \text{H}_2\text{O} + 4 \times \text{OAc}^- - \text{H}^+]^+$             | 678.9621         | 678.9617       |
| $\text{Gd}(\text{NO}_3)_3 \cdot 6\text{H}_2\text{O} + \text{glycine}$                                                          |                  |                |
| $[\text{GdO}]^+$                                                                                                               | 173.9190         | 173.9181       |
| $[\text{Gd}^{3+} + \text{glycine} + \text{glycerol} - 2 \times \text{H}^+]^+$                                                  | 322.9878         | 322.9862       |

|                                                                                        |           |          |
|----------------------------------------------------------------------------------------|-----------|----------|
| $[\text{Gd}^{3+} + 2 \times \text{glycerol} - 2 \times \text{H}^+]^+$                  | 340.0031  | 340.0014 |
| $[\text{Gd}^{3+} + 3 \times \text{glycine} - 2 \times \text{H}^+]^+$                   | 381.0045  | 381.0030 |
| $[\text{Gd}^{3+} + 2 \times \text{glycine} + \text{glycerol} - 2 \times \text{H}^+]^+$ | 398.0199  | 398.0180 |
| $[\text{Gd}^{3+} + \text{glycine} + 2 \times \text{glycerol} - 2 \times \text{H}^+]^+$ | 415.0352  | 415.0333 |
| <b>GdCl<sub>3</sub>·6H<sub>2</sub>O + glycine</b>                                      |           |          |
| $[\text{GdO}]^+$                                                                       | 173.9190  | 173.9184 |
| $[\text{Gd}^{3+} + \text{glycine} + \text{glycerol} - 2 \times \text{H}^+]^+$          | 322.9878  | 322.9871 |
| $[\text{Gd}^{3+} + 2 \times \text{glycerol} - 2 \times \text{H}^+]^+$                  | 340.0031  | 340.0026 |
| $[\text{Gd}^{3+} + 3 \times \text{glycine} - 2 \times \text{H}^+]^+$                   | 381.0045  | 381.0041 |
| $[\text{Gd}^{3+} + 2 \times \text{glycine} + \text{glycerol} - 2 \times \text{H}^+]^+$ | 398.0199  | 398.0195 |
| $[\text{Gd}^{3+} + \text{glycine} + 2 \times \text{glycerol} - 2 \times \text{H}^+]^+$ | 415.0352  | 415.0348 |
| <b>Gd<sub>2</sub>(SO<sub>4</sub>)<sub>3</sub>·8H<sub>2</sub>O + glycine</b>            |           |          |
| $[\text{GdO}]^+$                                                                       | 173.9190  | 173.9181 |
| $[\text{Gd}^{3+} + \text{glycine} + \text{glycerol} - 2 \times \text{H}^+]^+$          | 322.9878  | 322.9866 |
| $[\text{Gd}^{3+} + 2 \times \text{glycerol} - 2 \times \text{H}^+]^+$                  | 340.0031  | 340.0017 |
| $[\text{Gd}^{3+} + 3 \times \text{glycine} - 2 \times \text{H}^+]^+$                   | 381.0045  | 381.0030 |
| $[\text{Gd}^{3+} + 2 \times \text{glycine} + \text{glycerol} - 2 \times \text{H}^+]^+$ | 398.01985 | 398.0183 |
| $[\text{Gd}^{3+} + \text{glycine} + 2 \times \text{glycerol} - 2 \times \text{H}^+]^+$ | 415.0352  | 415.0337 |
| <b>GdBr<sub>3</sub>·13H<sub>2</sub>O + glycine</b>                                     |           |          |
| $[\text{GdO}]^+$                                                                       | 173.9190  | 173.9184 |
| $[\text{Gd}^{3+} + \text{glycine} + \text{glycerol} - 2 \times \text{H}^+]^+$          | 322.9878  | 322.9865 |
| $[\text{Gd}^{3+} + 2 \times \text{glycerol} - 2 \times \text{H}^+]^+$                  | 340.0031  | 340.0017 |
| $[\text{Gd}^{3+} + 3 \times \text{glycine} - 2 \times \text{H}^+]^+$                   | 381.0045  | 381.0030 |
| $[\text{Gd}^{3+} + 2 \times \text{glycine} + \text{glycerol} - 2 \times \text{H}^+]^+$ | 398.0199  | 398.0183 |
| $[\text{Gd}^{3+} + \text{glycine} + 2 \times \text{glycerol} - 2 \times \text{H}^+]^+$ | 415.0352  | 415.0338 |
| <b>Gd(OAc)<sub>3</sub>·4H<sub>2</sub>O + glycine</b>                                   |           |          |
| $[\text{GdO}]^+$                                                                       | 173.9190  | 173.9182 |
| $[\text{Gd}^{3+} + \text{glycine} + \text{glycerol} - 2 \times \text{H}^+]^+$          | 322.9878  | 322.9863 |
| $[\text{Gd}^{3+} + 2 \times \text{glycerol} - 2 \times \text{H}^+]^+$                  | 340.0031  | 340.0020 |
| $[\text{Gd}^{3+} + 3 \times \text{glycine} - 2 \times \text{H}^+]^+$                   | 381.0045  | 381.0031 |
| $[\text{Gd}^{3+} + 2 \times \text{glycine} + \text{glycerol} - 2 \times \text{H}^+]^+$ | 398.0199  | 398.0186 |
| $[\text{Gd}^{3+} + \text{glycine} + 2 \times \text{glycerol} - 2 \times \text{H}^+]^+$ | 415.0352  | 415.0340 |

*Table S2: <sup>1</sup>H, <sup>13</sup>C, and <sup>15</sup>N DNP enhancement factors, build-up time constants, contribution factors, and overall sensitivity improvements for 1.5 M 2-<sup>13</sup>C,<sup>15</sup>N-glycine in 6/3/1 v/v/v glycerol-d<sub>8</sub>/D<sub>2</sub>O/H<sub>2</sub>O at ~105 K at 14.1 T, for various concentrations of Gd(NO<sub>3</sub>)<sub>3</sub>*

| $[\text{Gd}(\text{NO}_3)_3] / \text{mM}$ | Nuclide         | $\epsilon$     | $T_{\text{B,ON}} / \text{s}$ | $\theta$        | $\epsilon_{\theta}$ |
|------------------------------------------|-----------------|----------------|------------------------------|-----------------|---------------------|
| 2                                        | <sup>1</sup> H  | $-1.8 \pm 0.1$ | $22.0 \pm 0.2$               | $1.03 \pm 0.04$ | $-3.2 \pm 0.2$      |
|                                          | <sup>13</sup> C | $-4.1 \pm 0.1$ | $1187 \pm 112$               |                 | $-4.5 \pm 0.4$      |
|                                          | <sup>15</sup> N | $_{-a}$        | $_{-a}$                      |                 | $_{-a}$             |
| 10                                       | <sup>1</sup> H  | $-2.7 \pm 0.1$ | $9.7 \pm 0.7$                | $0.69 \pm 0.03$ | $-4.8 \pm 0.3$      |
|                                          | <sup>13</sup> C | $-14 \pm 0.2$  | $442 \pm 18$                 |                 | $-17 \pm 1$         |
|                                          | <sup>15</sup> N | $-24 \pm 3$    | $1426 \pm 135$               |                 | $-30 \pm 4$         |
| 20                                       | <sup>1</sup> H  | $-4.5 \pm 0.1$ | $4.8 \pm 0.2$                | $0.43 \pm 0.02$ | $-7.2 \pm 0.3$      |
|                                          | <sup>13</sup> C | $-23 \pm 3$    | $222 \pm 7$                  |                 | $-24 \pm 3$         |
|                                          | <sup>15</sup> N | $-27 \pm 2$    | $304 \pm 31$                 |                 | $-47 \pm 5$         |
| 40                                       | <sup>1</sup> H  | $-2.8 \pm 0.3$ | $1.8 \pm 0.3$                | $0.26 \pm 0.04$ | $-4.4 \pm 0.9$      |
|                                          | <sup>13</sup> C | $-15 \pm 2$    | $114 \pm 9$                  |                 | $-13 \pm 3$         |
|                                          | <sup>15</sup> N | $-37 \pm 4$    | $124 \pm 6$                  |                 | $-61 \pm 12$        |
| 60                                       | <sup>1</sup> H  | $-2.0 \pm 0.3$ | $1.3 \pm 0.5$                | $0.20 \pm 0.01$ | $-2.8 \pm 0.6$      |
|                                          | <sup>13</sup> C | $-6.5 \pm 1.0$ | $67 \pm 11$                  |                 | $-5.8 \pm 1.1$      |
|                                          | <sup>15</sup> N | $-33 \pm 3$    | $58 \pm 6$                   |                 | $-60 \pm 12$        |
| 100                                      | <sup>1</sup> H  | $-2.7 \pm 0.6$ | $0.7 \pm 0.2$                | $0.07 \pm 0.01$ | $-1.8 \pm 0.5$      |
|                                          | <sup>13</sup> C | $-12 \pm 1$    | $36 \pm 5$                   |                 | $-5.1 \pm 0.6$      |

|  |                 |         |        |         |
|--|-----------------|---------|--------|---------|
|  | <sup>15</sup> N | -21 ± 1 | 22 ± 2 | -22 ± 2 |
|--|-----------------|---------|--------|---------|

<sup>a</sup> Not measured.

**Table S3: Electron spin-lattice and spin-spin relaxation times of various Gd(III) compounds and concentrations in 3/2 v/v glycerol/H<sub>2</sub>O at 100 K (except where noted), measured at X-band and Q-band, with and without 1.5 M glycine.**

| Gd(III) compound                                | Conc. / mM | $T_{1e}$ / ns         |                       |                      |                       | $T_{2e}$ / ns       |                     |                     |                     |
|-------------------------------------------------|------------|-----------------------|-----------------------|----------------------|-----------------------|---------------------|---------------------|---------------------|---------------------|
|                                                 |            | X-band                |                       | Q-band               |                       | X-band              |                     | Q-band              |                     |
| with (w) or without (w/o) glycine               |            | w/o                   | w                     | w/o                  | w                     | w/o                 | w                   | w/o                 | w                   |
| Gd(NO <sub>3</sub> ) <sub>3</sub>               | 2          | 455 ± 6               | 472 ± 3               | 640 ± 31             | 545 ± 1               | 230 ± 2             | 231 ± 1             | 264 ± 3             | 253 ± 2             |
|                                                 | 10         | 403 ± 4               | 433 ± 2               | 470 ± 2              | 470 ± 1               | 96.5 ± 0.6          | 115 ± 2             | 103.8 ± 0.3         | 93 ± 1              |
|                                                 | 20         | 312 ± 21              | 369 ± 3               | 398 ± 7              | 429 ± 11              | 72 ± 1              | 54 ± 1              | 59 ± 1              | 49 ± 2              |
|                                                 | 40         | 228 ± 37              | 263 ± 56              | 383 ± 8              | 470 ± 7               | 38 ± 4*             | 41 ± 3*             | 45 ± 6*             | 60 ± 1*             |
|                                                 | 60         | 148 ± 95              | 175 ± 85              | 332 ± 23             | 193 ± 38              | 48 ± 6*             | 53 ± 1*             | 40 ± 14*            | 36 ± 1*             |
|                                                 | 100        | 274 ± 17 <sup>†</sup> | 237 ± 11 <sup>†</sup> | 335 ± 4 <sup>†</sup> | 231 ± 15 <sup>†</sup> | 36 ± 2 <sup>†</sup> | 28 ± 1 <sup>†</sup> | 30 ± 6 <sup>†</sup> | 44 ± 2 <sup>†</sup> |
| GdCl <sub>3</sub>                               | 20         | 315 ± 7               | 417 ± 2               | 350 ± 2              | 443 ± 2               | 59 ± 1              | 66 ± 1              | 54.7 ± 0.2          | 52 ± 2              |
| Gd <sub>2</sub> (SO <sub>4</sub> ) <sub>3</sub> | 10         | 347 ± 6               | 378 ± 3               | 394 ± 4              | 404 ± 1               | 66 ± 3              | 60 ± 1              | 64.5 ± 0.2          | 59 ± 1              |
| GdBr <sub>3</sub>                               | 20         | 327 ± 8               | 331 ± 4               | 361 ± 11             | 362 ± 3               | 61 ± 5              | 48 ± 1              | 48 ± 2              | 48 ± 2              |
| Gd(OAc) <sub>3</sub>                            | 20         | 313 ± 10              | 295 ± 3               | 346 ± 1              | 391 ± 2               | 58 ± 2              | 58 ± 1              | 50 ± 2              | 55 ± 1              |

\* Measured at 80 K

<sup>†</sup> Measured at 30 K

**Table S4: <sup>1</sup>H, <sup>13</sup>C, and <sup>15</sup>N DNP enhancement factors, build-up time constants, contribution factors, and overall sensitivity improvements for 1.5 M 2-<sup>13</sup>C,<sup>15</sup>N-glycine in 6/3/1 v/v/v glycerol-d<sub>8</sub>/D<sub>2</sub>O/H<sub>2</sub>O at ~105 K at 14.1 T, for various Gd(III)-based polarizing agents.**

| Gd(III) compound                                | Nuclide         | $\epsilon$   | $T_{B,ON}$ / s | $\theta$    | $\epsilon_{\theta}$ |
|-------------------------------------------------|-----------------|--------------|----------------|-------------|---------------------|
| Gd(NO <sub>3</sub> ) <sub>3</sub>               | <sup>1</sup> H  | -4.5 ± 0.1   | 4.8 ± 0.2      | 0.43 ± 0.02 | -7.2 ± 0.3          |
|                                                 | <sup>13</sup> C | -23 ± 3      | 222 ± 7        |             | -24 ± 2             |
|                                                 | <sup>15</sup> N | -27 ± 2      | 304 ± 31       |             | -48 ± 5             |
| GdCl <sub>3</sub>                               | <sup>1</sup> H  | -4.7 ± 0.3   | 4.6 ± 0.2      | 0.44 ± 0.02 | -7.8 ± 0.6          |
|                                                 | <sup>13</sup> C | -20 ± 1      | 244 ± 8        |             | -21 ± 3             |
|                                                 | <sup>15</sup> N | -30 ± 1      | 331 ± 14       |             | -51 ± 3             |
| Gd <sub>2</sub> (SO <sub>4</sub> ) <sub>3</sub> | <sup>1</sup> H  | -3.1 ± 0.4   | 4.2 ± 1.0      | 0.39 ± 0.02 | -4.8 ± 0.8          |
|                                                 | <sup>13</sup> C | -17 ± 1      | 253 ± 15       |             | -15 ± 2             |
|                                                 | <sup>15</sup> N | -27 ± 2      | 405 ± 51       |             | -36 ± 4             |
| GdBr <sub>3</sub>                               | <sup>1</sup> H  | -3.4 ± 0.2   | 3.8 ± 0.2      | 0.44 ± 0.02 | -6.3 ± 0.8          |
|                                                 | <sup>13</sup> C | -13 ± 1      | 184 ± 11       |             | -15 ± 1             |
|                                                 | <sup>15</sup> N | -29 ± 1      | 278 ± 28       |             | -53 ± 5             |
| Gd(OAc) <sub>3</sub>                            | <sup>1</sup> H  | -0.39 ± 0.03 | 2.9 ± 0.6      | 0.46 ± 0.02 | -0.85 ± 0.10        |
|                                                 | <sup>13</sup> C | -9.7 ± 0.2   | 162 ± 24       |             | -13 ± 2             |
|                                                 | <sup>15</sup> N | -17 ± 1      | 229 ± 14       |             | -35 ± 3             |

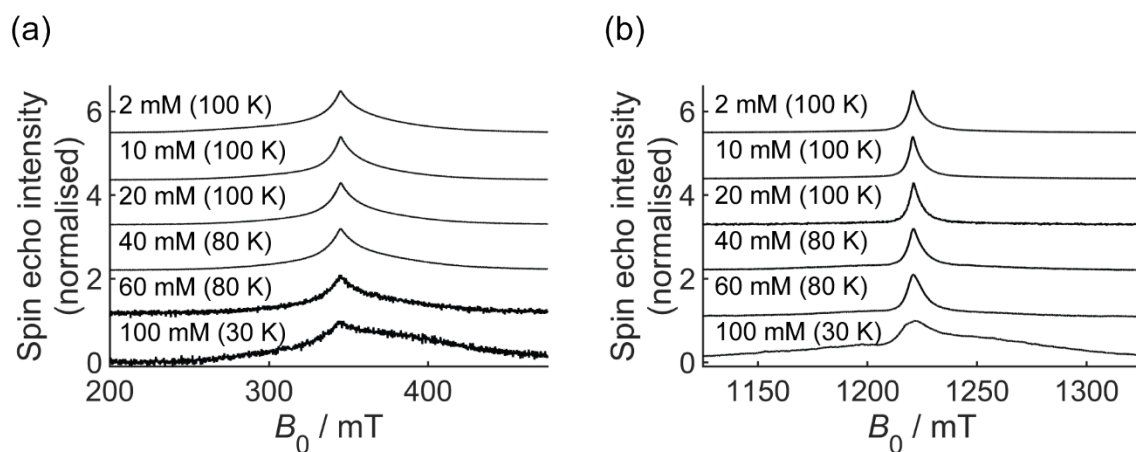

Figure S2: Echo-detected field-swept EPR spectra of various concentrations of  $\text{Gd}(\text{NO}_3)_3$  in 3/2 v/v glycerol/ $\text{H}_2\text{O}$  with 1.5 M glycine, measured at (a) X-band and (b) Q-band.

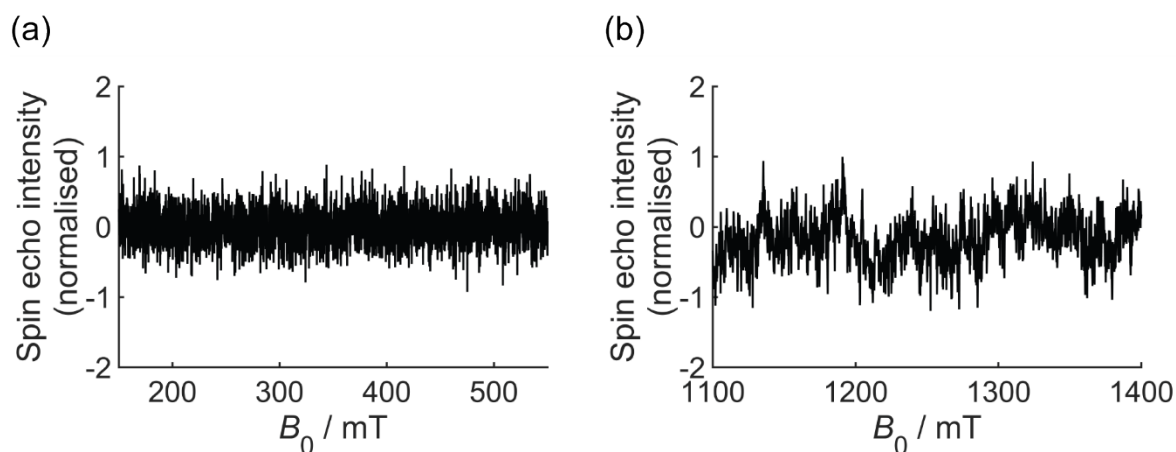

Figure S3: Echo-detected field-swept EPR spectra of 3/2 v/v glycerol/ $\text{H}_2\text{O}$ , measured at (a) X-band and (b) Q-band at 30 K.

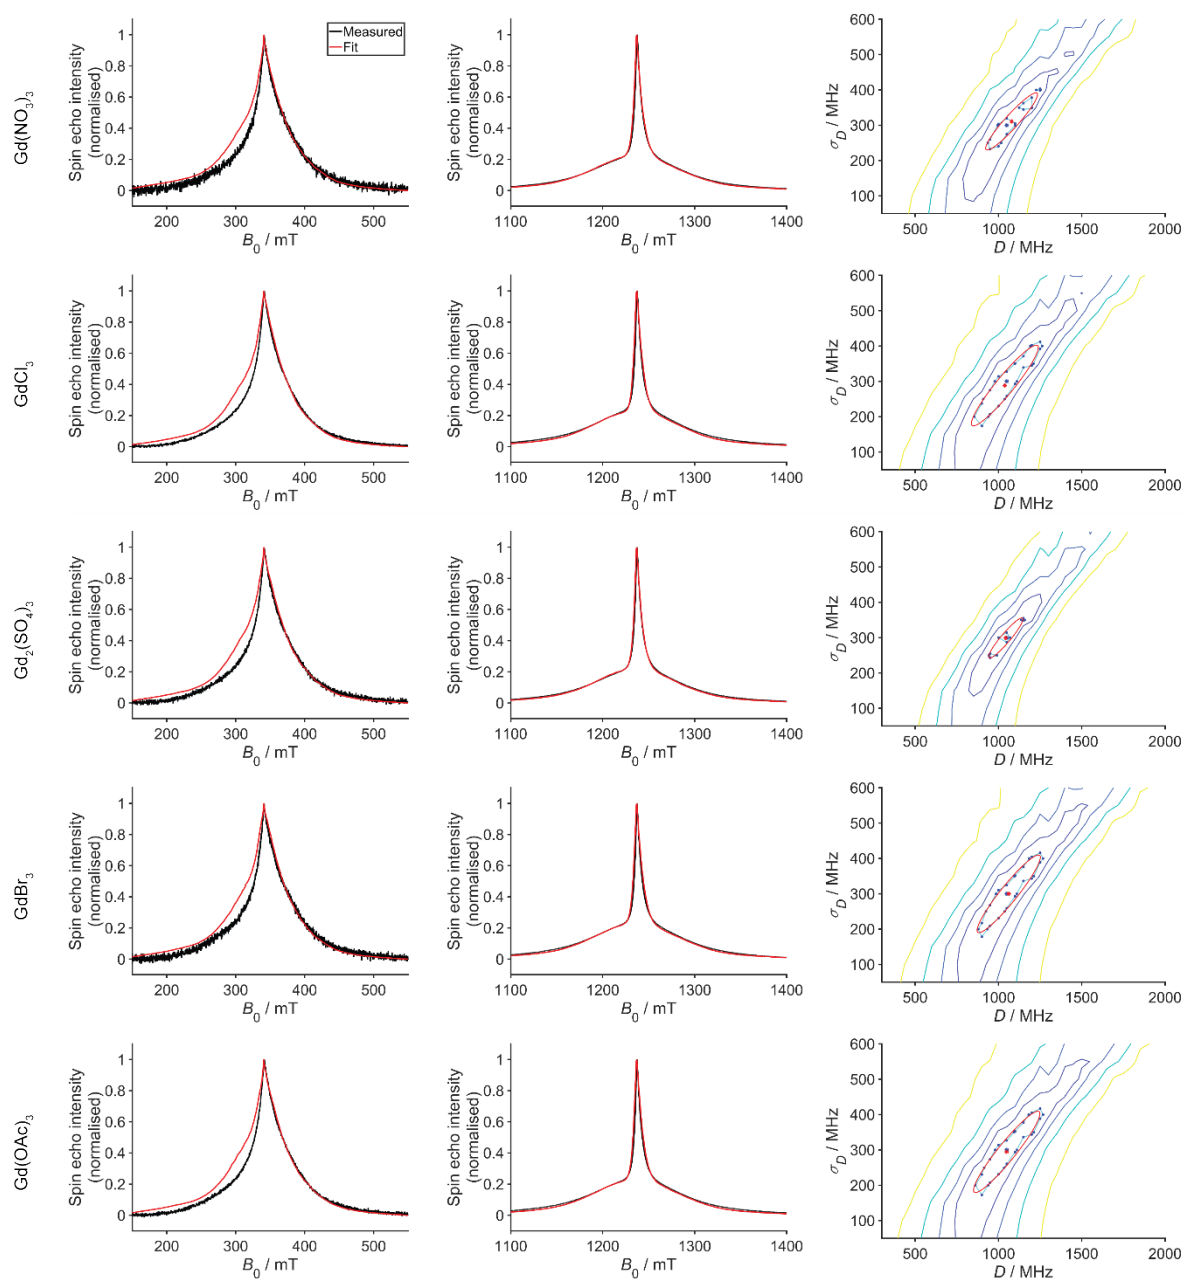

**Figure S4:** Fits to the echo detected field swept X-band and Q-band EPR spectra, along with contour plots, for 25  $\mu\text{M}$  of all Gd(III) compounds in 3/2 v/v glycerol/ $\text{H}_2\text{O}$  at 10 K.

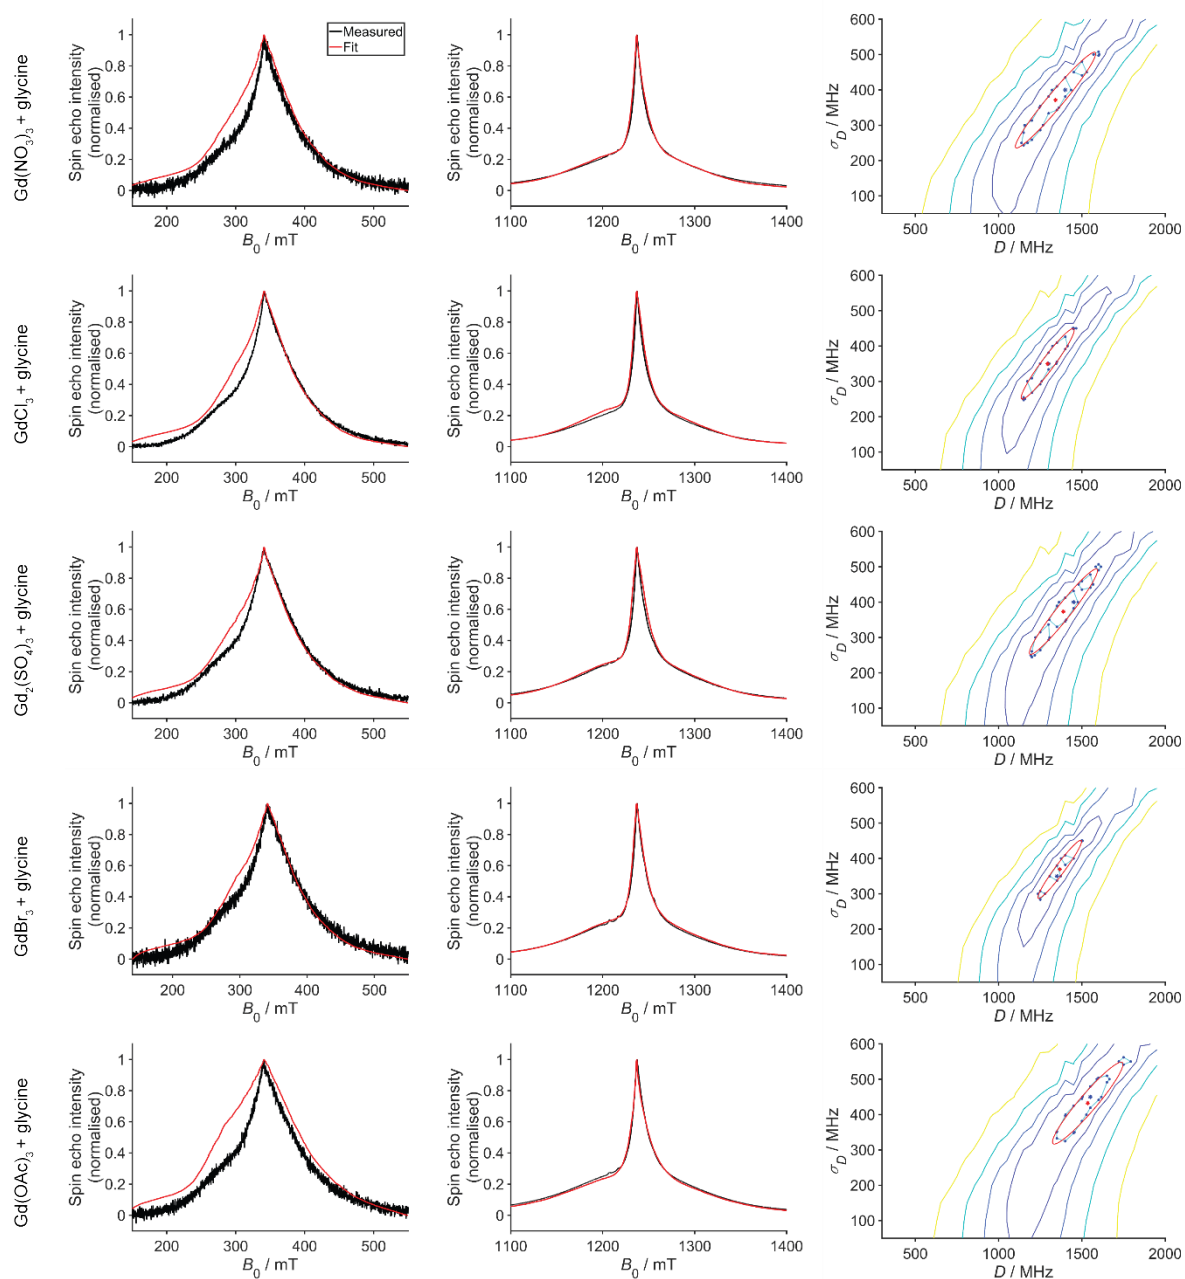

**Figure S5:** Fits to the echo detected field swept X-band and Q-band EPR spectra, along with contour plots, for 25  $\mu\text{M}$  of all Gd(III) compounds in 3/2 v/v glycerol/ $\text{H}_2\text{O}$  at 10 K, with 1.5 M glycine added.
